# Supplementary material for: Cyst growth in ADPKD is prevented by pharmacological and genetic inhibition of TMEM16A in vivo
Source: PubMed Central journal article supplement (PMC7455562; doi:10.1038/s41467-020-18104-5), 2020-08-28
Supplement: 41467_2020_18104_MOESM1_ESM.pdf [file 41467_2020_18104_MOESM1_ESM.pdf]

# **Cyst growth in ADPKD is prevented by pharmacological and genetic inhibition of TMEM16A *in vivo***

<sup>1</sup>Ines Cabrita<sup>#</sup>, <sup>2</sup>Andre Kraus<sup>#</sup>, <sup>2</sup>Julia Katharina Scholz, <sup>2</sup>Kathrin Skoczynski, <sup>1</sup>Rainer Schreiber<sup>&</sup>, <sup>1</sup>Karl Kunzelmann<sup>§,&</sup>, <sup>2</sup>Björn Buchholz<sup>&</sup>

## **Supplementary Information**

Content:

- Supplementary Figure 1
- Supplementary Figure 2
- Supplementary Figure 3
- Supplementary Figure 4
- Supplementary Figure 5
- Supplementary Figure 6
- Supplementary Figure 7
- Supplementary Figure 8
- Supplementary Figure 9
- Supplementary Figure 10
- Supplementary Figure 11

Corresponding author  
Karl Kunzelmann  
e-mail: [karl.kunzelmann@ur.de](mailto:karl.kunzelmann@ur.de)  
Tel.: +49 (0)941 943 4302

# Supplementary Figure 1

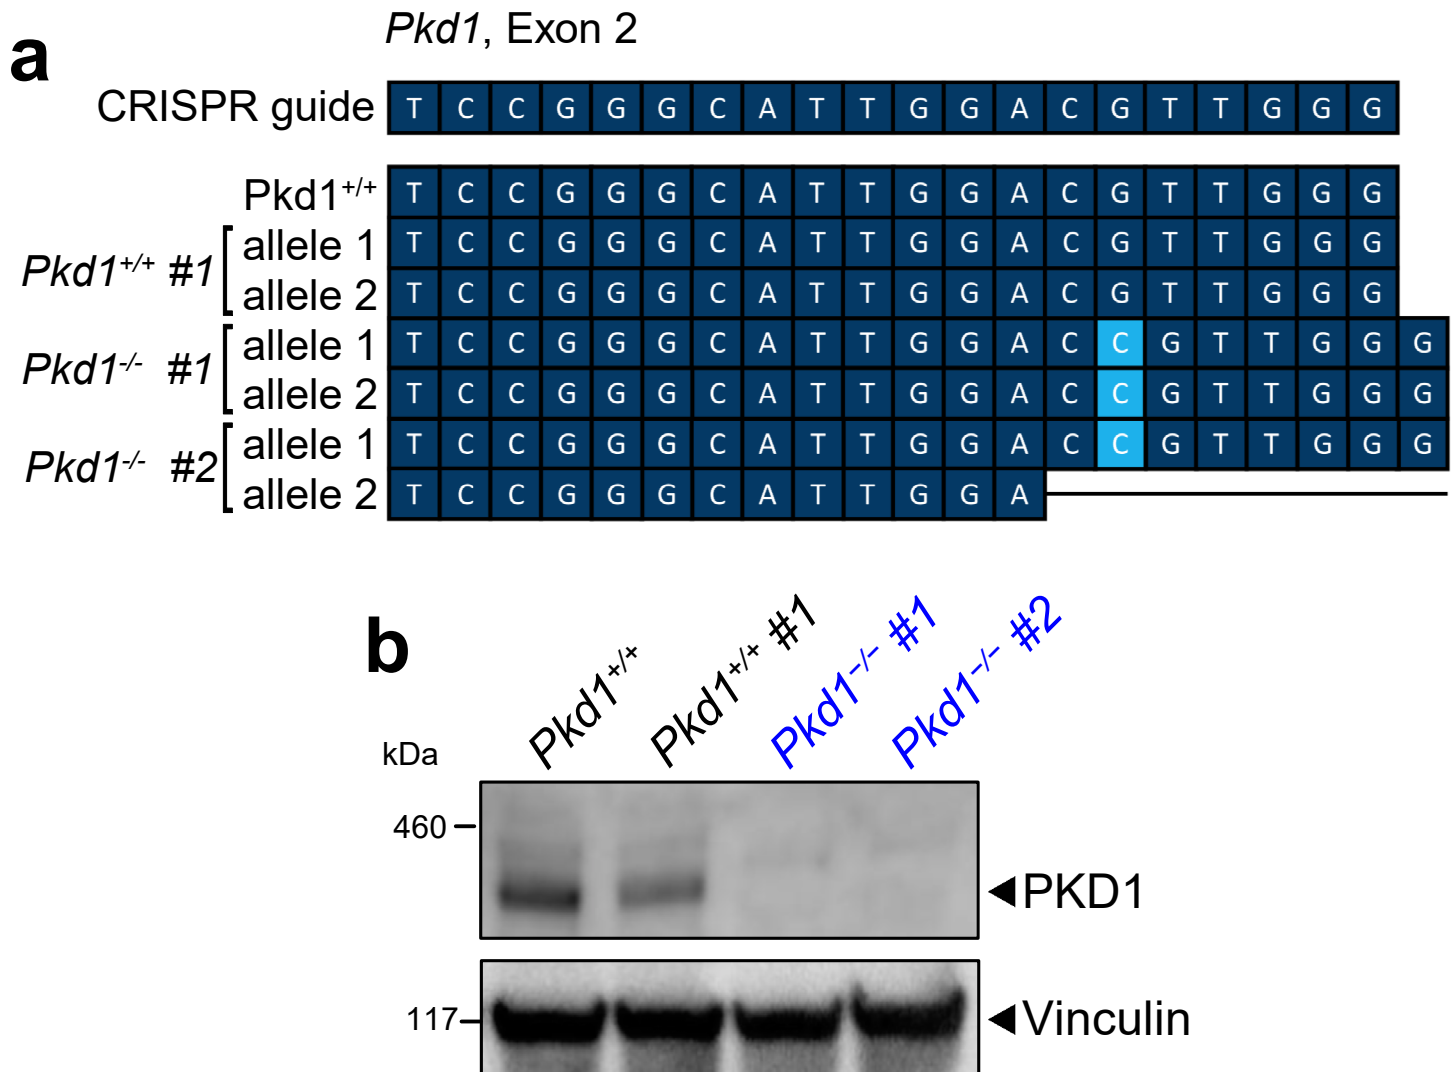

**Supplementary Figure 1. Validation of the CRISPR/Cas9-mediated *Pkd1* knockout in pIMDCK cells.** **a** DNA sequences of CRISPR guide, wildtype (*Pkd1*<sup>+/+</sup>), control clone (*Pkd1*<sup>+/+</sup> #1) and two *Pkd1* knockout clones (*Pkd1*<sup>-/-</sup> #1 and #2) confirming unaffected DNA sequences in wild type and control clone, and mutations in the two *Pkd1* knockout clones either resulting in insert mutations (light blue) or deletion (black line). **b** Representative Western blots for Polycystin-1 (PKD1, ~450 kDa) (vinculin as loading control, ~116 kDa) showing expression in wild type (*Pkd1*<sup>+/+</sup>) and control clone (*Pkd1*<sup>+/+</sup> #1) and lack of Polycystin-1 expression in two *Pkd1* knockout clones (*Pkd1*<sup>-/-</sup> #1 and #2). (n=2 blots each). Source data are provided as a Source Data file.

## Supplementary Figure 2

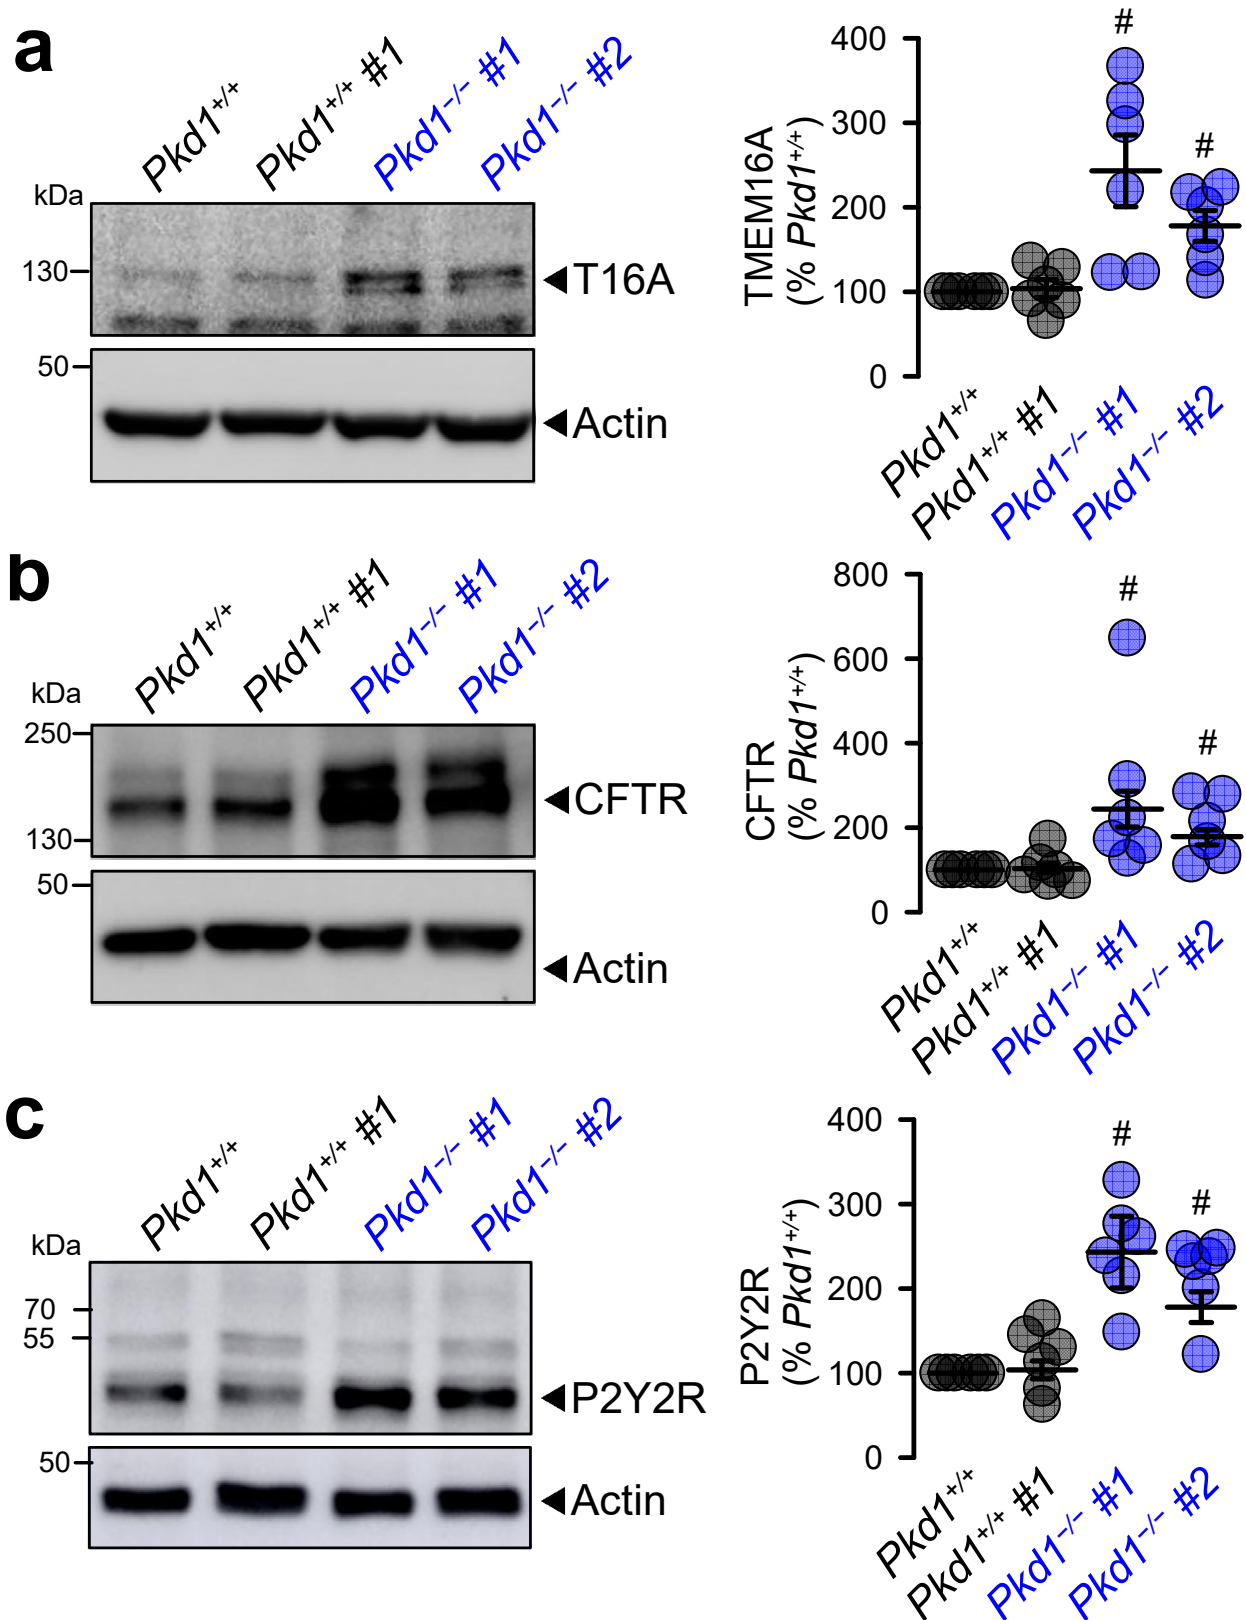

**Supplementary Figure 2. PKD1-deficiency in pIMDCK cells leads to upregulation of TMEM16A, CFTR, and P2Y2R.** **a** Western blotting for pIMDCK wildtype (*Pkd1*<sup>+/+</sup>), control clone (*Pkd1*<sup>+/+</sup> #1) and *Pkd1*-deficient clones (*Pkd1*<sup>-/-</sup> #1 and *Pkd1*<sup>-/-</sup> #2) detecting an increase of TMEM16A (~130 kDa) expression upon deletion of *Pkd1* (#P=0.02 and #P=0.005) (n=6 replicates). **b** Western blotting from cell clones described in (a), detecting an increase of CFTR (~170 kDa) expression upon deletion of *Pkd1* in clone #1 and #2 (#P=0.02 and #P=0.007) (n=6 replicates). **c** Western blotting from cell clones described in (a) detecting an increase of P2Y2R (~47 kDa) expression upon deletion of *Pkd1* (#P=0.002 and #P=0.002) (n=6 replicates). Mean and error bars indicating  $\pm$  SEM. <sup>s</sup>unpaired two-sided t-test. Source data are provided as a Source Data file.

## Supplementary Figure 3

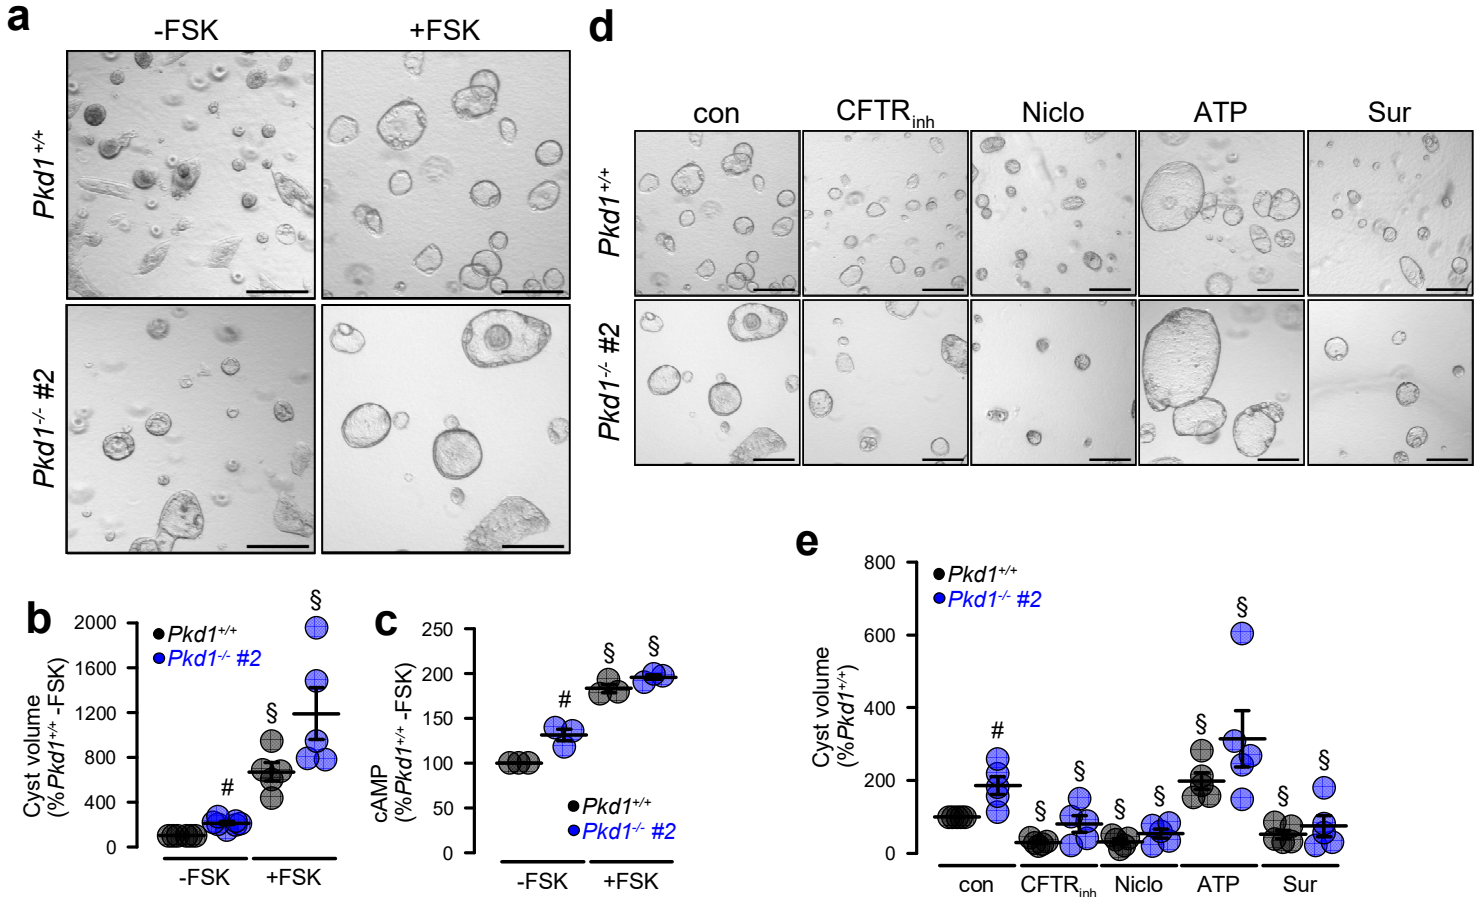

**Supplementary Figure 3. Cyst formation by polycystin-1-deficient collecting duct cells depends on cAMP- and Ca<sup>2+</sup>-activated Cl<sup>-</sup> secretion.** **a,b.** Wild type (*Pkd1*<sup>+/+</sup>) and polycystin-1-deficient (*Pkd1*<sup>-/-</sup>) principal-like MDCK cells (clone #2) were cultured in a collagen matrix in the absence (-Fsk) or presence (+Fsk) of 10 μM forskolin. Forskolin induced cyst formation by *Pkd1*<sup>+/+</sup> cells within 5 days. *Pkd1*<sup>-/-</sup> cells demonstrated cyst formation even in the absence of FSK (#*P*=0.0001) and formed larger cysts in the presence of FSK (§*P*=0.002 and §*P*=0.012). (n=105 cysts examined in n=3 independent experiments). **c.** Deletion of polycystin-1 induced an increase in basal intracellular cAMP concentrations (-Fsk) (#*P*=0.022). FSK-stimulation further enhanced cAMP levels in both *Pkd1*<sup>+/+</sup> and *Pkd1*<sup>-/-</sup> cells (§*P*=0.003 and §*P*=0.006) (each n=3 independent experiments). cAMP levels in *Pkd1*<sup>+/+</sup> cells were set to 100%. **d,e.** Enhanced (#*P*=0.026) cyst growth in *Pkd1*<sup>-/-</sup> and cyst growth in *Pkd1*<sup>+/+</sup> was strongly inhibited by CFTR<sub>inh</sub>172 (CFTR<sub>inh</sub>; 10 μM) (§*P*<0.0001 and §*P*=0.014), niclosamide (Niclo; 1 μM) (§*P*=0.0007 and §*P*=0.002), and suramin (Sur; 100 μM) (§*P*=0.014 and §*P*=0.019), but was further augmented by ATP (10 μM) (§*P*<0.014 and §*P*=0.04). (n=87 cysts examined in n=3 independent experiments). Bars 200 μm. Mean and error bars indicating ± SEM. #§unpaired two-sided t-test. Source data are provided as a Source Data file.



## Supplementary Figure 4

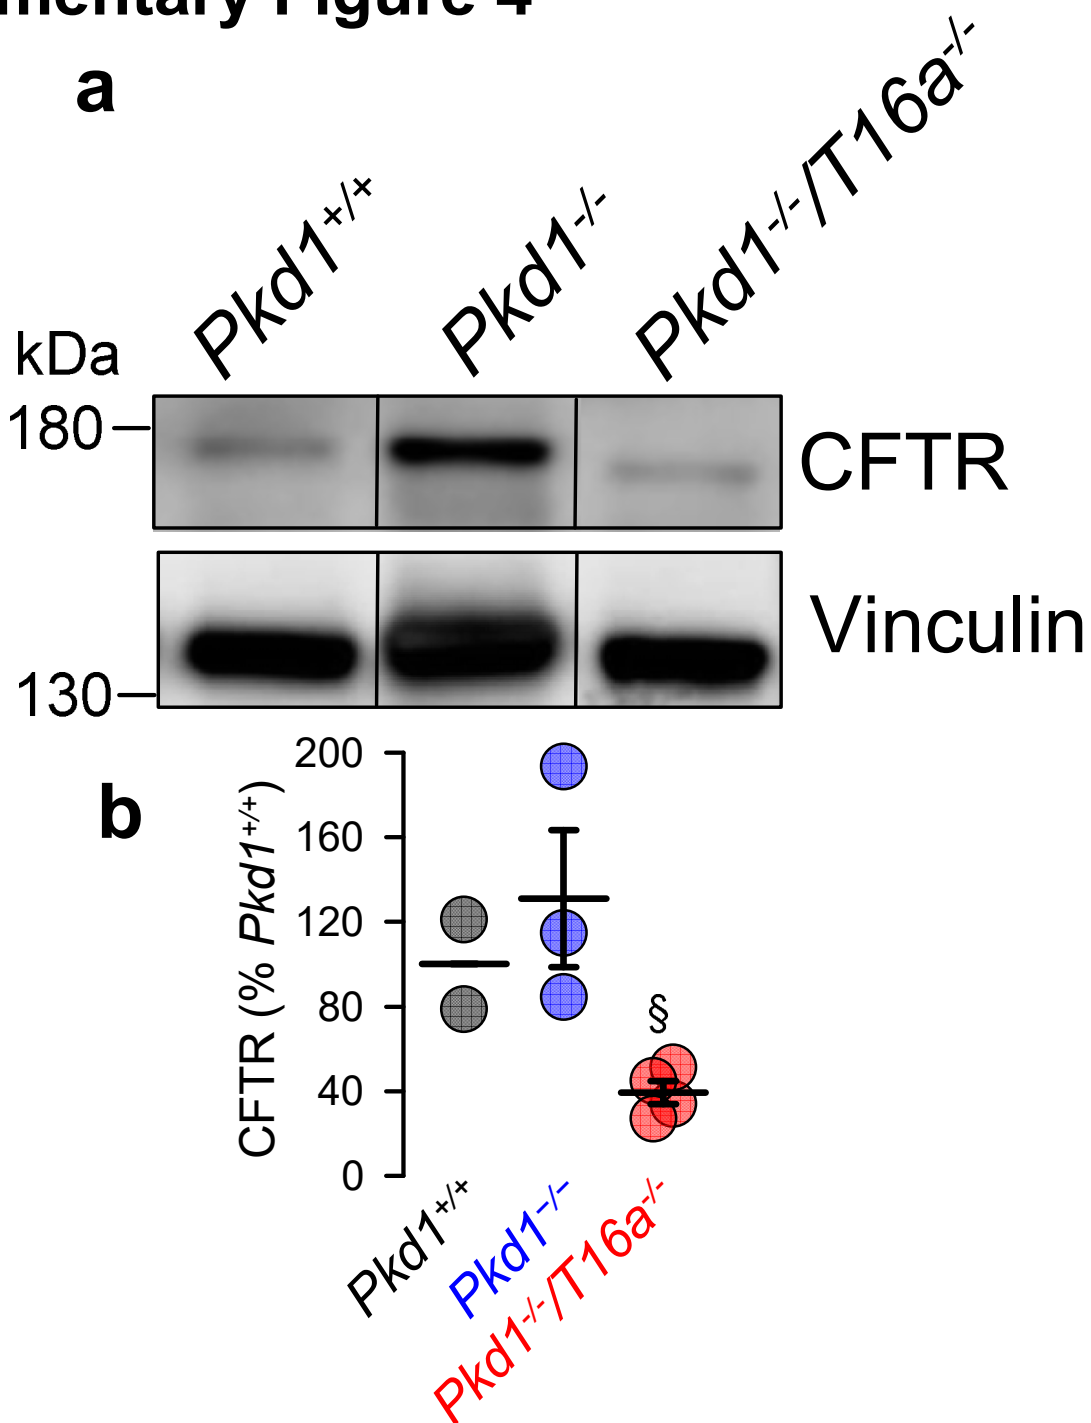

**Supplementary Figure 4. Deletion of *Tmem16a* inhibits expression of CFTR.** a,b. Analysis of CFTR (~ 170 kDa) expression in protein lysates from whole kidneys (Vinculin as loading control, ~ 116 kDa) 10 weeks after induction of *Pkd1*<sup>-/-</sup>, and *Pkd1*<sup>-/-</sup>/*Tmem16a*<sup>-/-</sup> double knockout mice. Densitometric quantification indicating non-significant upregulation of CFTR-expression in *Pkd1*<sup>-/-</sup> kidneys and reduced expression of CFTR in *Pkd1*<sup>-/-</sup>/*Tmem16a*<sup>-/-</sup> kidneys (§*P*=0.021). (n=3 independent blots). Mean and error bars indicating ± SEM. §unpaired two-sided t-test. Source data are provided as a Source Data file.

## Supplementary Figure 5

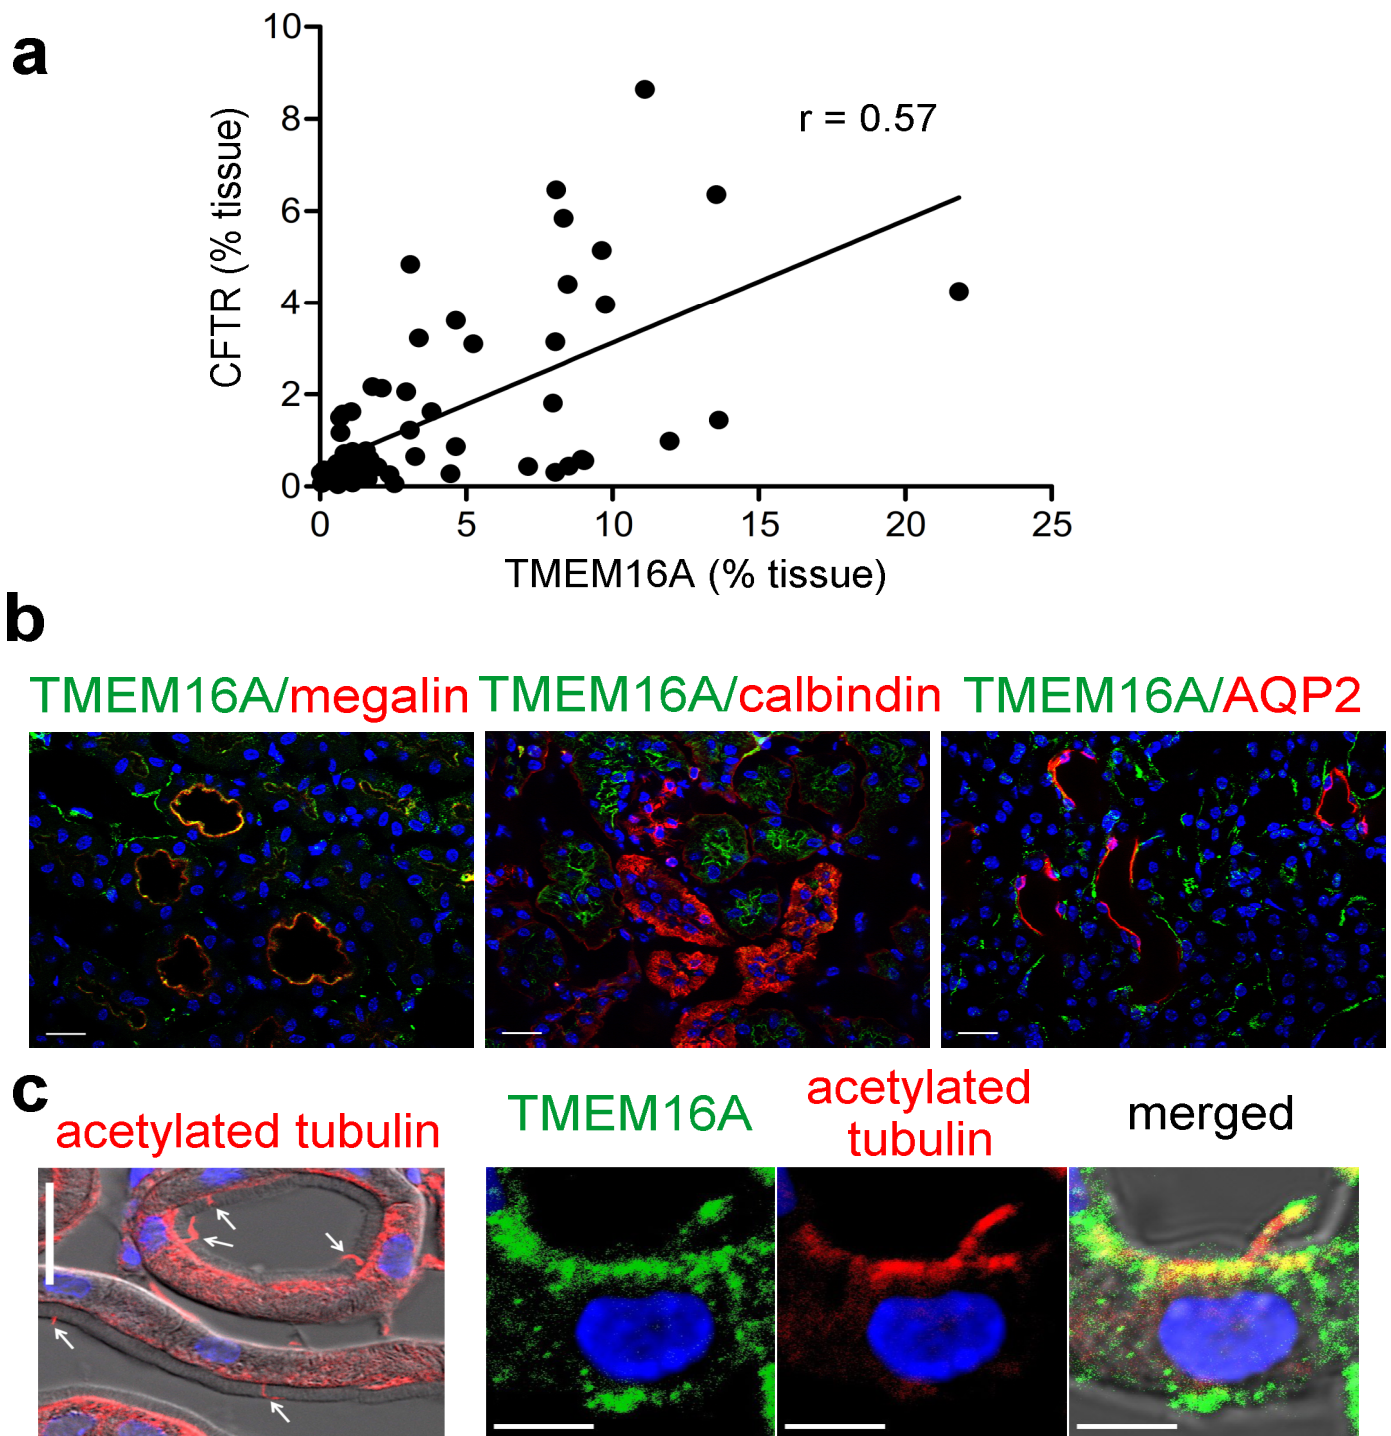

**Supplementary Figure 5. Expression of TMEM16A and CFTR in murine kidney. a.** Correlation between expression of TMEM16A and CFTR in the cyst epithelium of *Pkd1*<sup>-/-</sup> kidneys. Expression of TMEM16A and CFTR was normalized to tissue area. (n=25 images from n=5 mice). A correlation was found between expression of CFTR and TMEM16A (Pearson coefficient  $r=0.57$ ). **b.** Expression of TMEM16A in *Pkd1*<sup>+/+</sup> kidneys. Colocalization was detected for TMEM16A and megalin (marker for proximal tubular epithelial cells), but not for TMEM16A and calbindin (marker for distal tubule) or TMEM16A and aquaporin 2 (AQP2) (marker for collecting duct). Representative images of kidneys from n=3 animals. Bar 20  $\mu\text{m}$ . **c.** Primary cilia in *Pkd1*<sup>+/+</sup> renal tubules were identified using acetylated tubulin staining, which expressed TMEM16A. (Representative images of kidneys from n=3 animals). Bar 5  $\mu\text{m}$ . Source data are provided as a Source Data file.

## Supplementary Figure 6

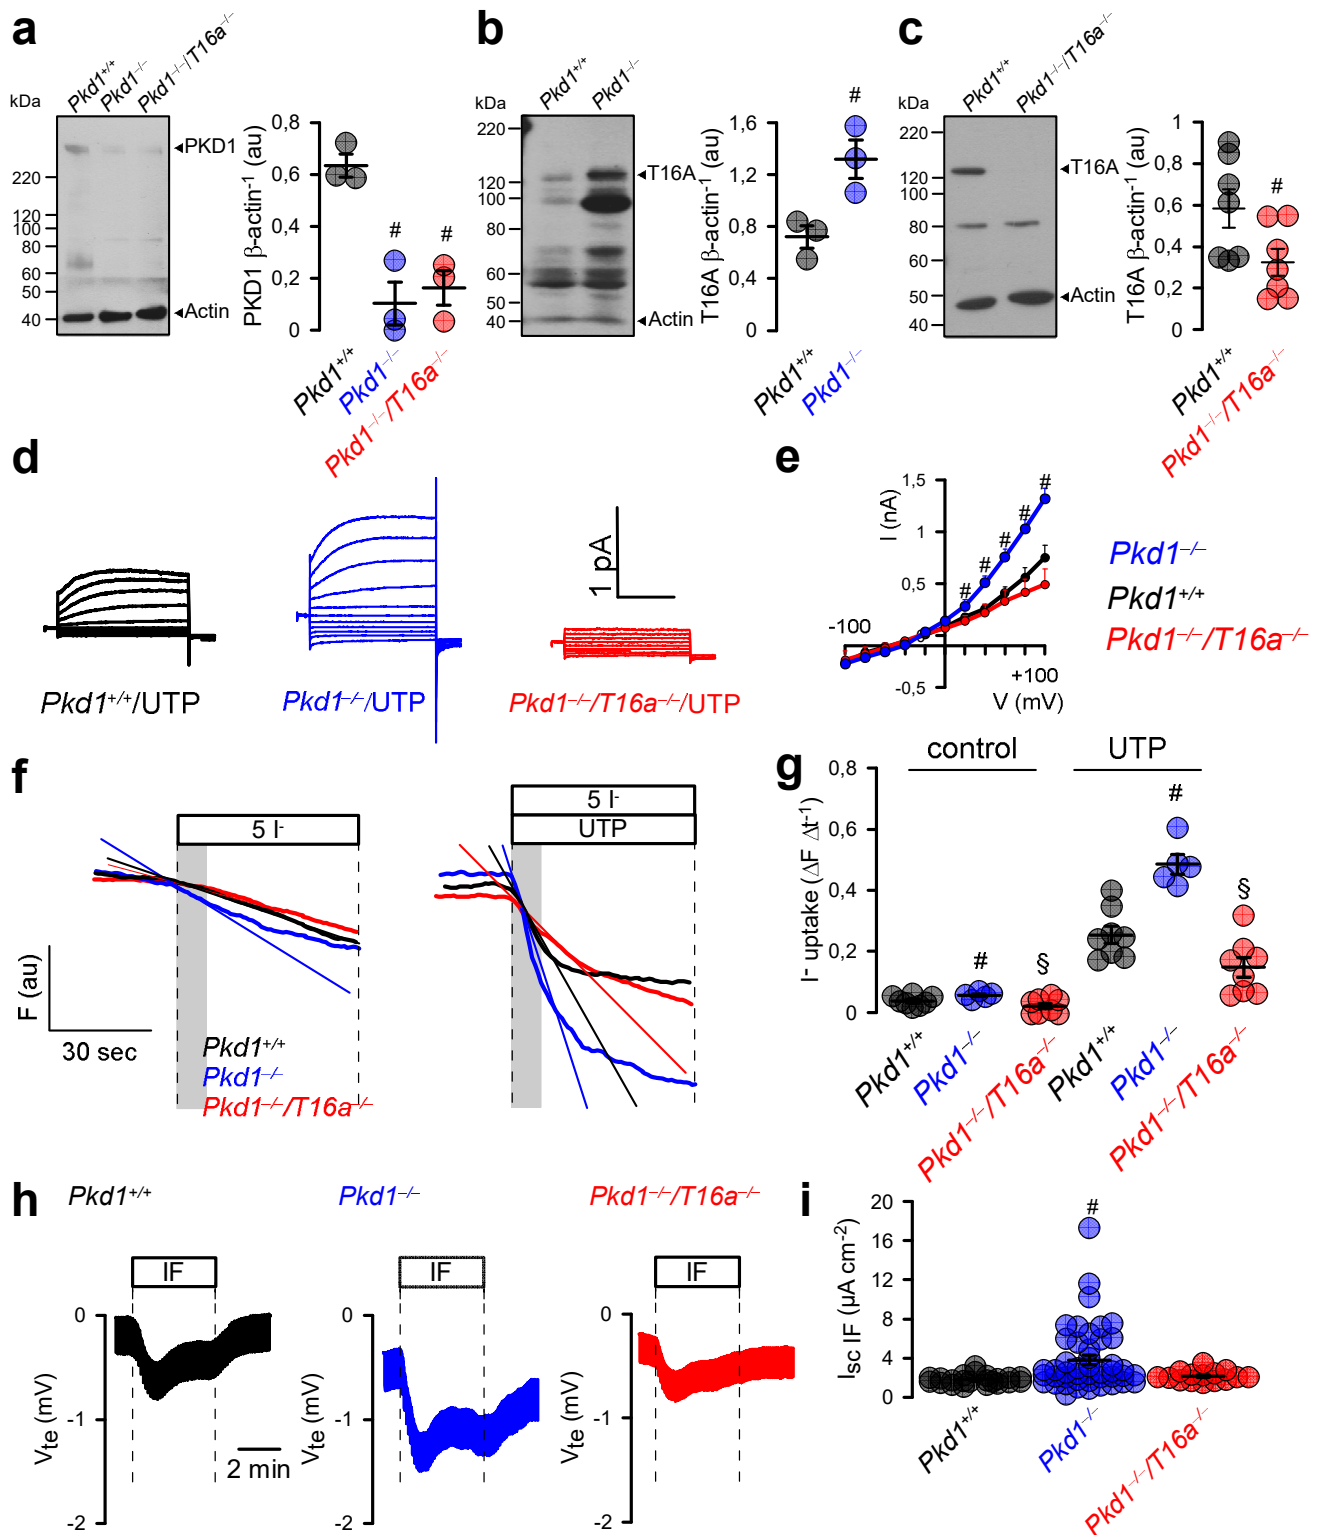

**Supplementary Figure 6. TMEM16A is essential for upregulated chloride conductance in primary *Pkd1*<sup>-/-</sup> cells. a.** Western blots and densitometric analysis indicating knockdown of Polycystin-1 (~ 450 kDa) in renal epithelial cells from *Pkd1*<sup>-/-</sup> (#P=0.003) and *Pkd1*<sup>-/-</sup>/*T16a*<sup>-/-</sup> (#P=0.006) mice (n=67 cells from n=3 animals). #one-way ANOVA and Tukey's post-hoc test. **b.** Western blot and densitometric analysis indicating increased expression of TMEM16A (~ 130 kDa) in renal epithelial cells from *Pkd1*<sup>-/-</sup> mice (#P=0.025) mice (n=3 blots from n=3 animals). #unpaired two-sided t-test. **c.** Inhibited expression of TMEM16A in cells from *Pkd1*<sup>-/-</sup>/*T16a*<sup>-/-</sup> mice (#P=0.025) (n=7 blots from n=3 animals). Actin was used as loading control. #unpaired two-sided t-test. **d,e.** Original recordings of whole cell currents and corresponding current/voltage relationships obtained in UTP-stimulated medullary primary epithelial cells isolated from *Pkd1*<sup>+/+</sup>, *Pkd1*<sup>-/-</sup> and *Pkd1*<sup>-/-</sup>/*T16a*<sup>-/-</sup> mice. (#P<0.02) (n=17 cells from n=3 animals each). #one-way ANOVA and Tukey's post-hoc test **f.** Basal and Ca<sup>2+</sup>-activated (100 μM UTP) anion conductances detected by YFP quenching. Initial slopes correlate with size of anion conductance. **g.** Summary of initial slopes, (ΔFluorescence/s) indicating enhanced basal (#P=0.047) and UTP-activated (#P=0.0003) uptake in *Pkd1*<sup>-/-</sup> cells. Compared to *Pkd1*<sup>-/-</sup> cells, uptake was reduced in cells from *Pkd1*<sup>-/-</sup>/*T16a*<sup>-/-</sup> mice (§P=0.015 and §P<0.0001). (n=126 cells from n=3 animals each). **h,i.** Original recordings and summaries of Ussing chamber experiments with primary medullary epithelial cells from *Pkd1*<sup>+/+</sup>, *Pkd1*<sup>-/-</sup> and *Pkd1*<sup>-/-</sup>/*T16a*<sup>-/-</sup> double knockout mice, showing enhanced Cl<sup>-</sup> secretion by activation of CFTR with IBMX/forskolin (IF; 100 μM/2 μM) in *Pkd1*<sup>-/-</sup> cells (#P=0.007). (n=18 filters from n=3 animals each). #one-way ANOVA and Tukey's post-hoc test. Mean and error bars indicating ± SEM. Source data are provided as a Source Data file.

## Supplementary Figure 7

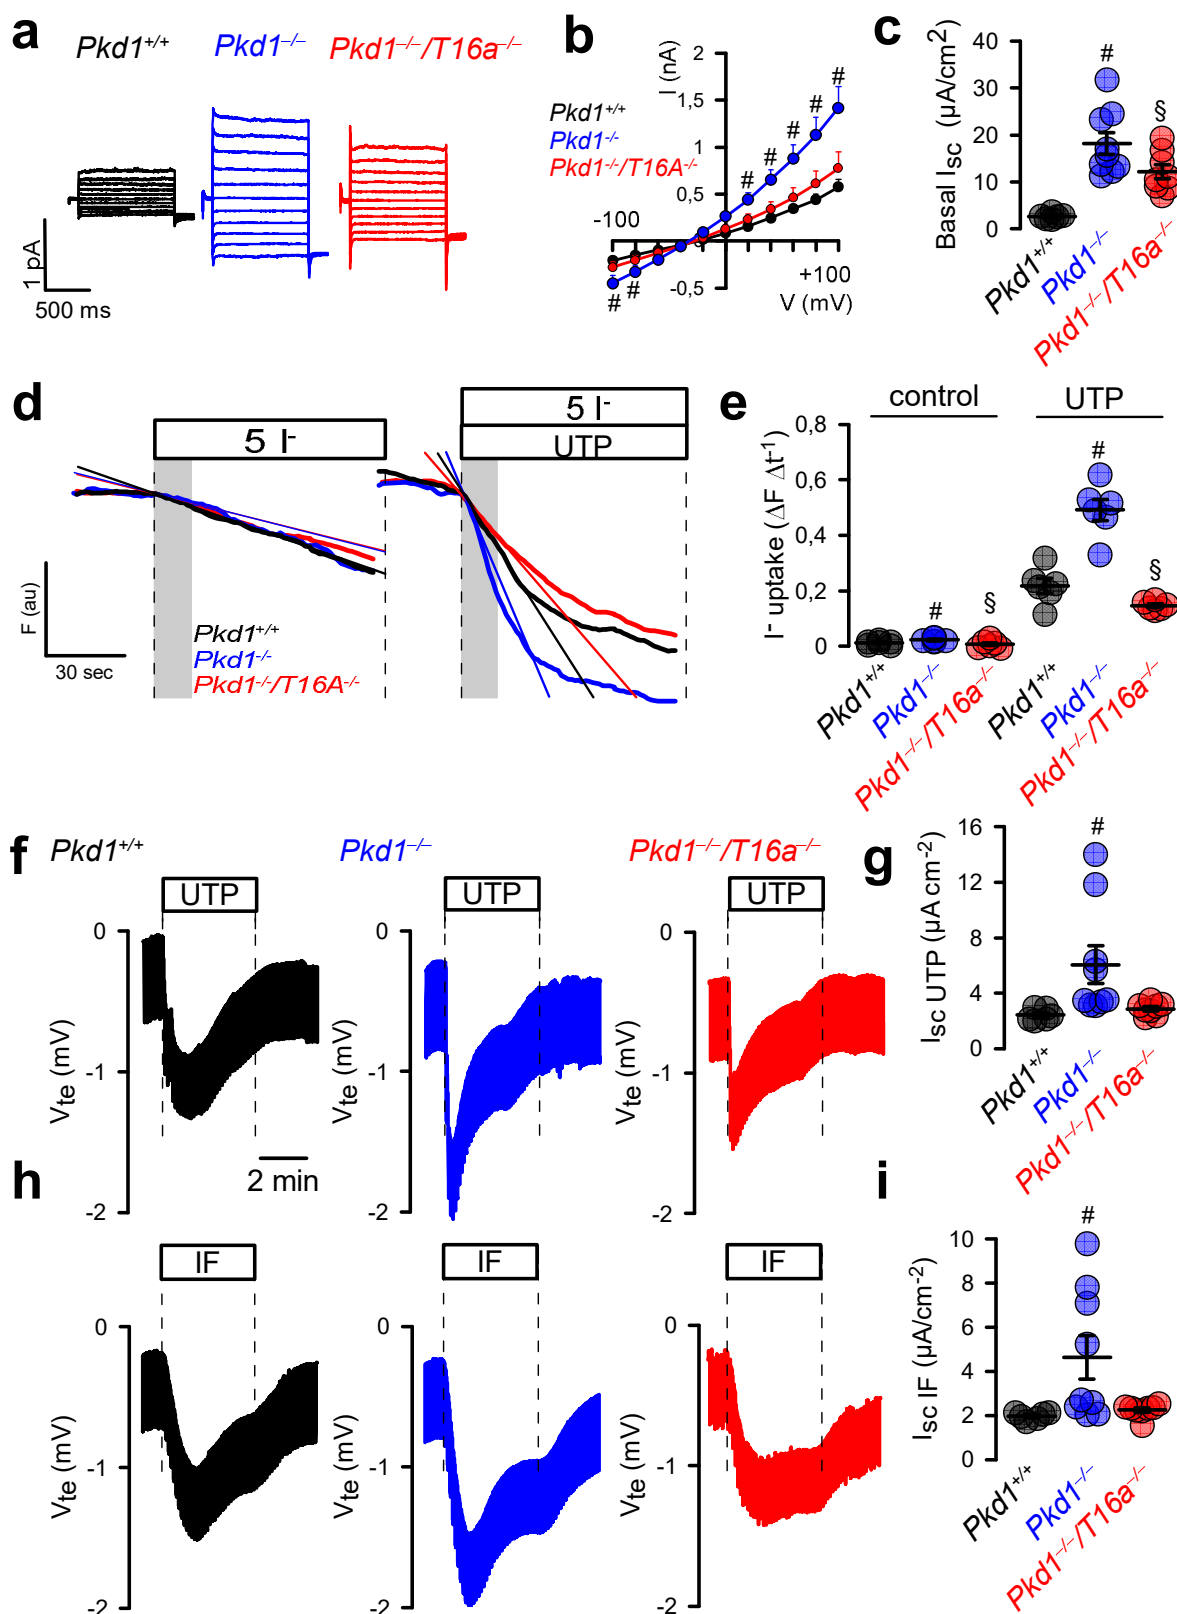

**Supplementary Figure 7. TMEM16A is essential for upregulated Cl<sup>-</sup> conductance in cortical primary epithelial cells from *Pkd1*<sup>-/-</sup> mice.** **a,b.** Whole cell currents and corresponding current/voltage relationships obtained in primary cortical epithelial cells isolated from *Pkd1*<sup>+/+</sup>, *Pkd1*<sup>-/-</sup> and *Pkd1*<sup>-/-</sup>/*T16a*<sup>-/-</sup> mice. (<sup>#</sup>P<0.01) (n=19 cells from n=3 animals each). **c.** Summary of short circuit currents measured in Ussing chamber recordings showed upregulated transport in *Pkd1*<sup>-/-</sup> cells (<sup>#</sup>P<0.0001), which was lower in *Pkd1*<sup>-/-</sup>/*T16a*<sup>-/-</sup> cells (<sup>§</sup>P=0.007). (n=15 filters from n=4 mice each). **d,e.** Basal and Ca<sup>2+</sup>-activated (100 μM UTP) anion permeability assessed by YFP quenching. Summaries of YFP quenching (initial slope, ΔFluorescence/s) indicate upregulation of basal (<sup>#</sup>P<0.028) and UTP-activated (<sup>#</sup>P=0.0001) anion conductance in *Pkd1*<sup>-/-</sup> cells, which was inhibited in *Pkd1*<sup>-/-</sup>/*T16a*<sup>-/-</sup> double knockout cells (<sup>§</sup>P<0.036 and <sup>§</sup>P=0.0002). (n=131 cells from n=4 animals each). **f-i.** Original Ussing chamber recordings and calculated short circuit currents indicate upregulated Cl<sup>-</sup> conductance activated by UTP (100 μM) (<sup>#</sup>P=0.039) (n=14 filters from n=3 animals each) or IBMX/Forskolin (I/F; 100 μM, 2 μM)

## Supplementary Figure 8

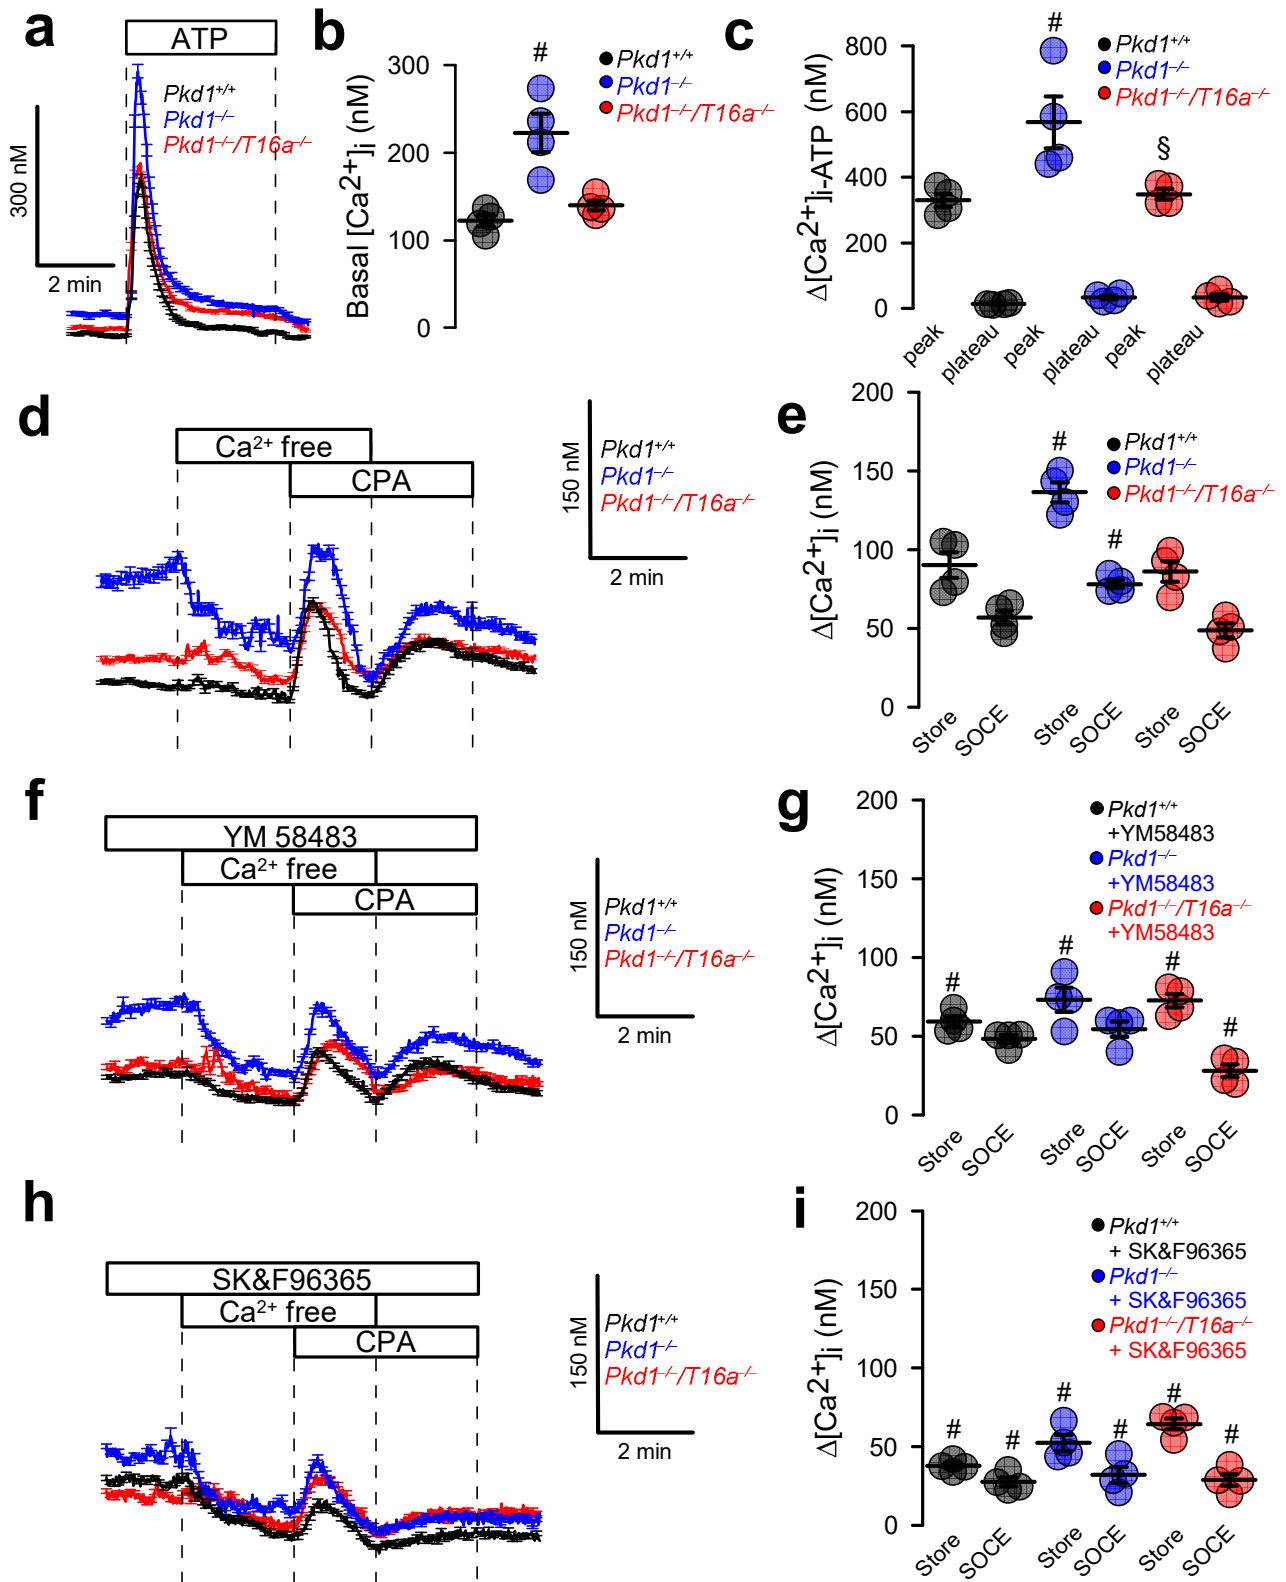

**Supplementary Figure 8. Augmented  $Ca^{2+}$  signals in cortical primary epithelial cells.** **a-c.** Original recordings and summaries for basal and ATP (100  $\mu M$ ) induced increase in intracellular  $Ca^{2+}$ .  $Ca^{2+}$  peak (ER store release) was enhanced in primary cells from *Pkd1*<sup>-/-</sup> (# $P=0.001$ ), but was reduced in cells from *Pkd1*<sup>-/-</sup>/*T16a*<sup>-/-</sup> kidneys (§ $P=0.003$ ). (n=137 cells from n=3 animals each). **d,e.** Original recordings and summaries for cyclopiazonic acid (CPA, 10  $\mu M$ ) induced store release and SOCE which were augmented in cells from *Pkd1*<sup>-/-</sup> (# $P=0.002$  and # $P=0.01$ ) (n=131 cells from n=3 animals each). **f-i.** Original recordings and summaries from experiments performed in the presence of Orai-inhibitor YM58483 and TRP-inhibitor SK&F96365 (both 5  $\mu M$ ). YM58483 inhibited store release in *Pkd1*<sup>+/+</sup> (# $P=0.025$ ), *Pkd1*<sup>-/-</sup> (# $P<0.0001$ ) and *Pkd1*<sup>-/-</sup>/*T16a*<sup>-/-</sup> cells (# $P=0.02$ ) and SOCE in *Pkd1*<sup>-/-</sup>/*T16a*<sup>-/-</sup> cells (# $P=0.015$ ). (n=134 cells from n=3 animals each). SK&F96365 inhibited store release in *Pkd1*<sup>+/+</sup> (# $P<0.0001$ ), *Pkd1*<sup>-/-</sup> (# $P<0.0001$ ) and *Pkd1*<sup>-/-</sup>/*T16a*<sup>-/-</sup> cells (# $P<0.05$ ), and SOCE in *Pkd1*<sup>+/+</sup> (# $P=0.0007$ ), *Pkd1*<sup>-/-</sup> (# $P<0.0001$ ) and *Pkd1*<sup>-/-</sup>/*T16a*<sup>-/-</sup> cells (# $P=0.024$ ). (n=137 cells from n=3 animals each). Mean and error bars indicating  $\pm$  SEM. #§one-way ANOVA and Tukey's post-hoc test. Source data are provided as a Source Data file.



# Supplementary Figure 9

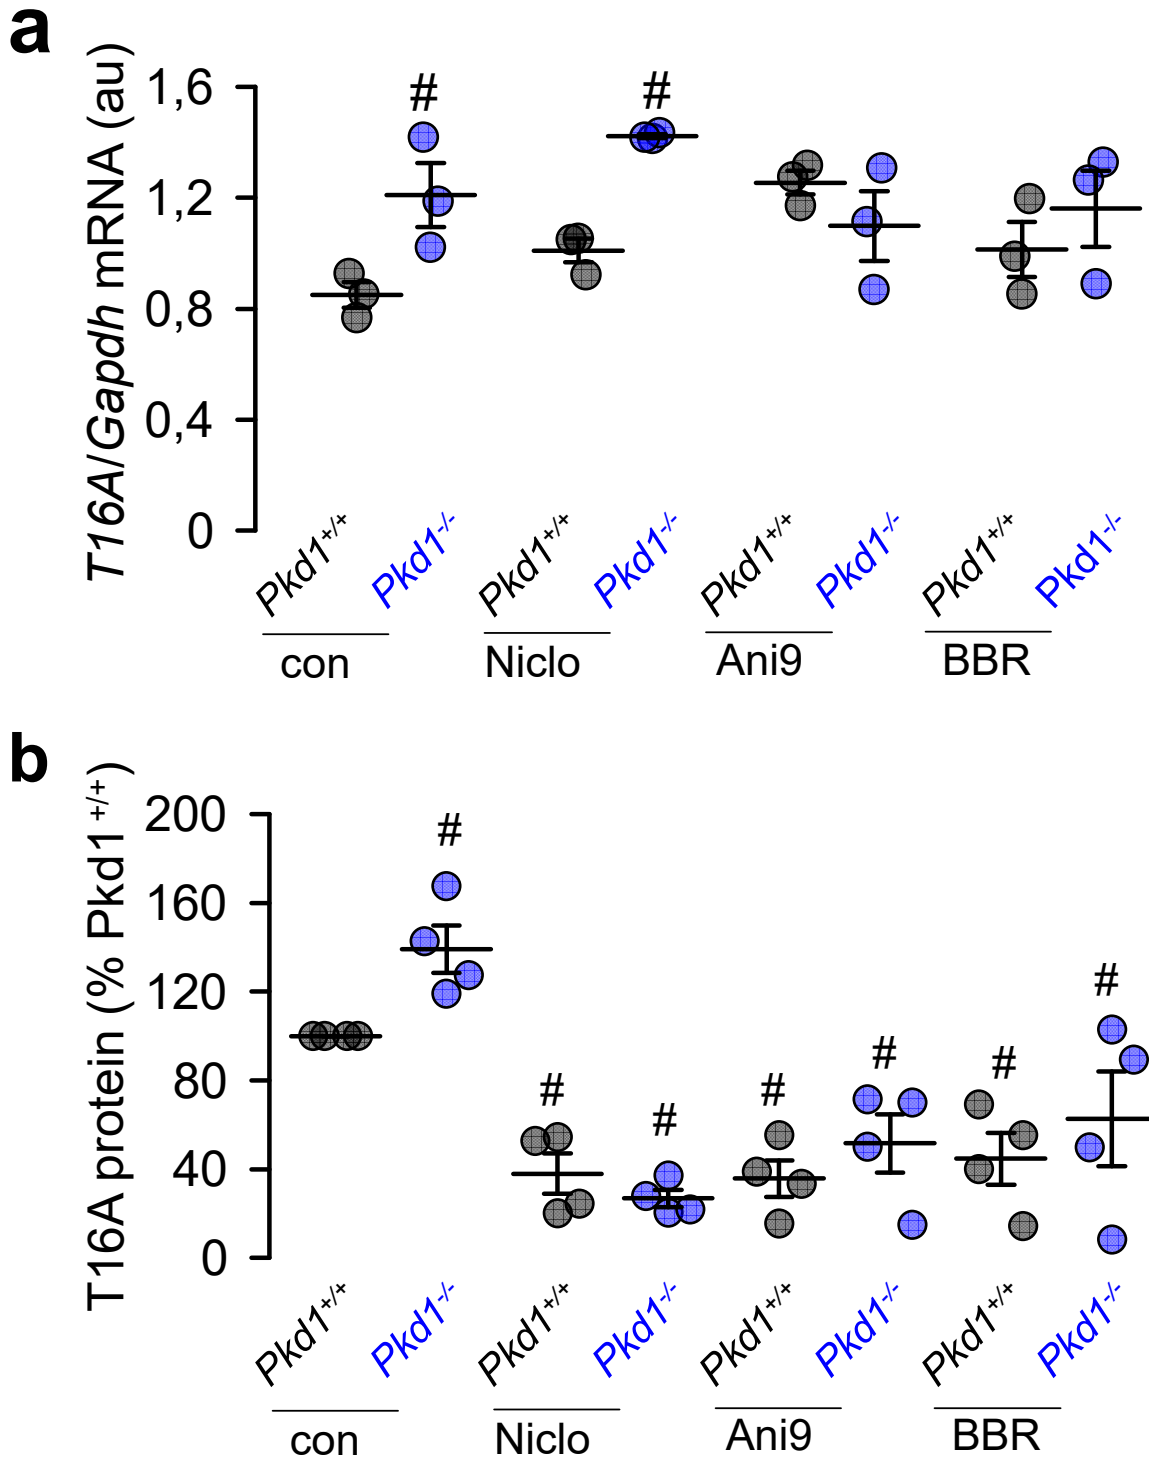

**Supplementary Figure 9. TMEM16A-inhibitors block expression of TMEM16A in renal epithelial cells.** **a.** Expression of TMEM16A mRNA assessed by semiquantitative RT-PCR and subsequent densitometric analysis in *Pkd1*<sup>+/+</sup> and *Pkd1*<sup>-/-</sup> renal epithelial cells. Expression was enhanced in *Pkd1*<sup>-/-</sup> cells under control (<sup>#</sup>*P*=0.04), and in the presence of Niclo (<sup>#</sup>*P*=0.005). (n=3 reactions for each inhibitor from n=2 animals). **b.** Expression of TMEM16A protein assessed by Western blotting and subsequent densitometric analysis in *PKD1*<sup>+/+</sup> and *PKD1*<sup>-/-</sup> renal epithelial cells. Expression was enhanced in *Pkd1*<sup>-/-</sup> cells under control (<sup>#</sup>*P*<0.035). Expression was inhibited in *Pkd1*<sup>+/+</sup> and *Pkd1*<sup>-/-</sup> cells by Niclo (<sup>#</sup>*P*=0.006 and <sup>#</sup>*P*<0.0001), Ani9 (<sup>#</sup>*P*=0.004 and <sup>#</sup>*P*=0.002), and BBR (<sup>#</sup>*P*=0.018 and <sup>#</sup>*P*=0.018) (n=4 blots for each inhibitor from n=2 animals). Cells were grown in the absence or presence of the TMEM16A inhibitors niclosamide (Niclo; 0.5 μM), Ani9 (1 μM) and benzbromarone (BBR; 5 μM) for 72h. Mean and error bars indicating ± SEM. <sup>#</sup>unpaired two-sided t-test. Source data are provided as a Source Data file.



# Supplementary Figure 10

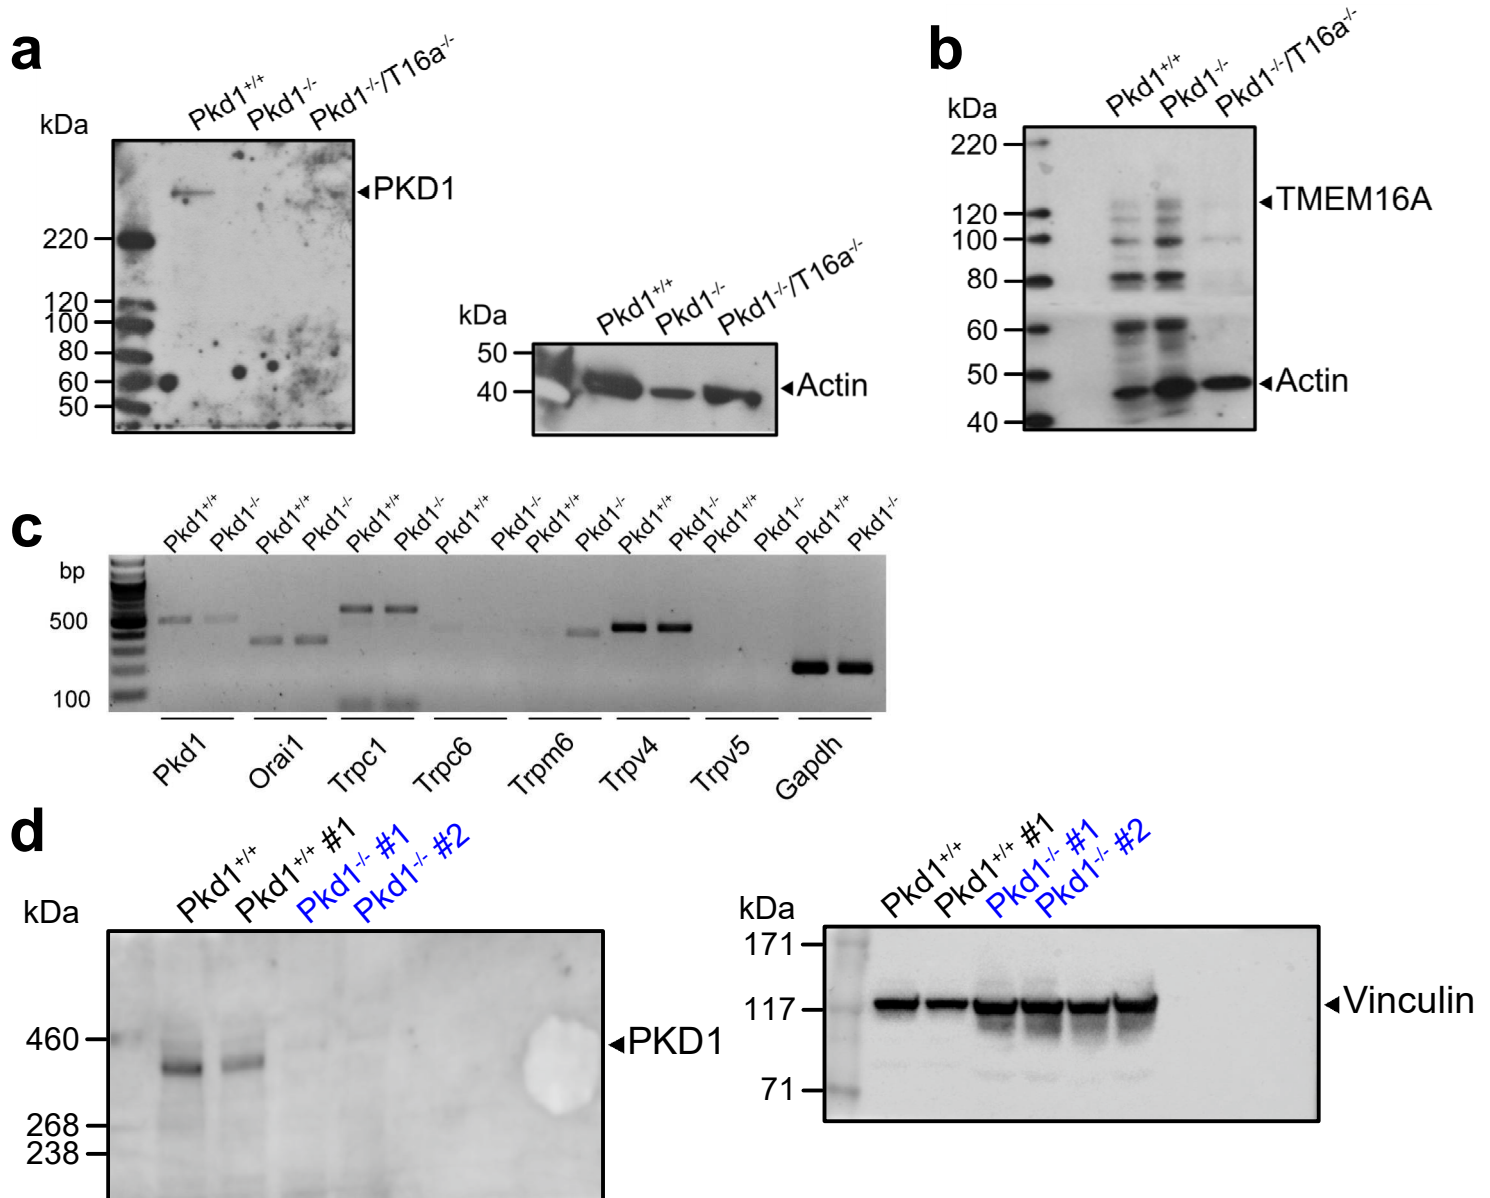

**Supplementary Fig. 10.** Original uncropped blots and gels. Blots shown belong to **a** Fig. 2a, **b** Fig. 2c, and **c** Fig. 5e, **d** Supplementary Fig. 1b. Molecular weight markers (kDa or bp) are shown at the left side of the blots.

# Supplementary Figure 11

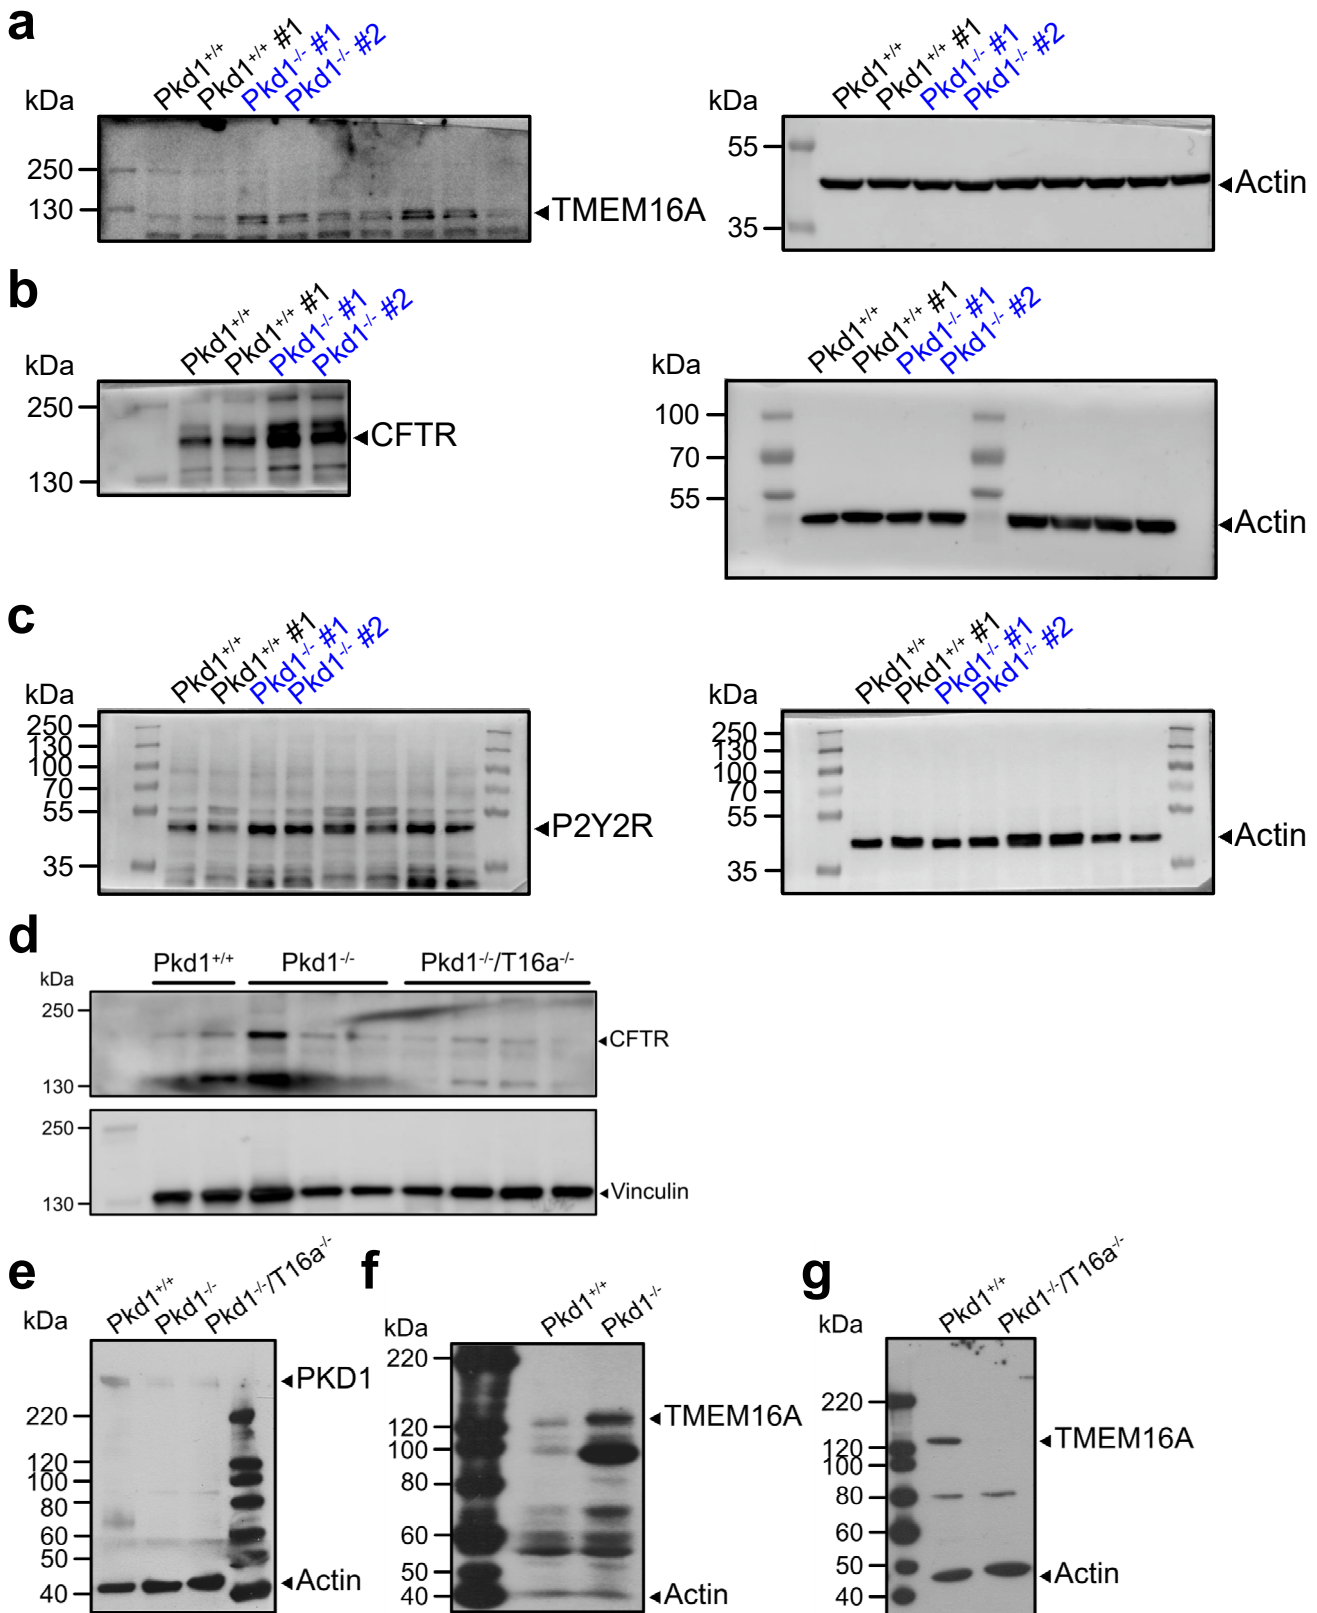

**Supplementary Fig. 11.** Original uncropped blots. Blots shown belong to **a-c** Supplementary Fig. 2a-c, **d** Supplementary Fig. 4a, **e-g** Supplementary Fig. 6a-c. Molecular weight markers (kDa or bp) are shown at the left side of the blots.
